# Supplementary material for: Metal-mediated nanobody assemblies as potent alleviators of human islet amyloid polypeptide aggregation
Source: Royal Society of Chemistry journal article supplement (doi:10.1039/d2qm01372j), 2023-01-01
Supplement: d2qm01372j1.pdf [file d2qm01372j1.pdf]

## Supporting Information for

# Metal-Mediated Nanobody Assemblies as Potent Alleviator of Human Islet Amyloid Polypeptide Aggregation

*Liyuan Zhao<sup>1</sup>, Liang Luo<sup>1,2,3,\*</sup> and Fanling Meng<sup>1,2,3,\*</sup>*

<sup>1</sup>National Engineering Research Center for Nanomedicine, College of Life Science and Technology, Huazhong University of Science and Technology, Wuhan, 430074, China

<sup>2</sup>Key Laboratory of Molecular Biophysics of the Ministry of Education, College of Life Science and Technology, Huazhong University of Science and Technology, Wuhan, 430074, China

<sup>3</sup>Hubei Key Laboratory of Bioinorganic Chemistry and Materia Medica, School of Chemistry and Chemical Engineering, Huazhong University of Science and Technology, Wuhan 430074, China

Corresponding authors: [Fanlingmeng@hust.edu.cn](mailto:Fanlingmeng@hust.edu.cn); [Liangluo@hust.edu.cn](mailto:Liangluo@hust.edu.cn)

| Contents  | Pages |
|-----------|-------|
| Figure S1 | S-2   |
| Figure S2 | S-3   |
| Figure S3 | S-4   |

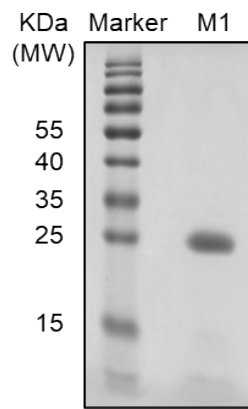

**Figure S1.** SDS-PAGE analysis of M1.

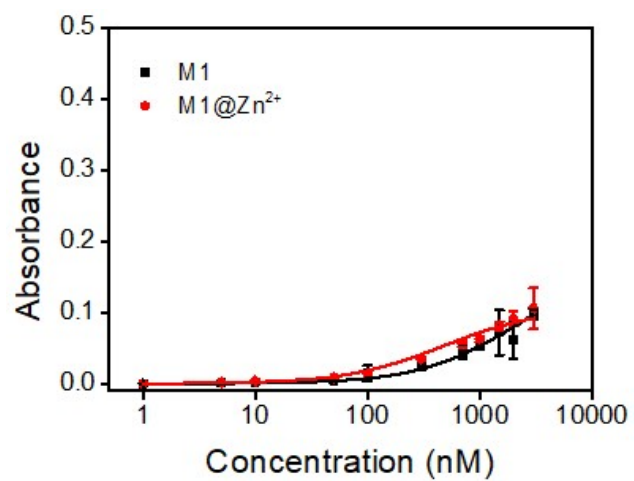

**Figure S2.** The binding affinity of M1 and M1@Zn<sup>2+</sup> to IAPP monomers analyzed by ELISA assay. IAPP monomer concentration was 2.5  $\mu$ M.

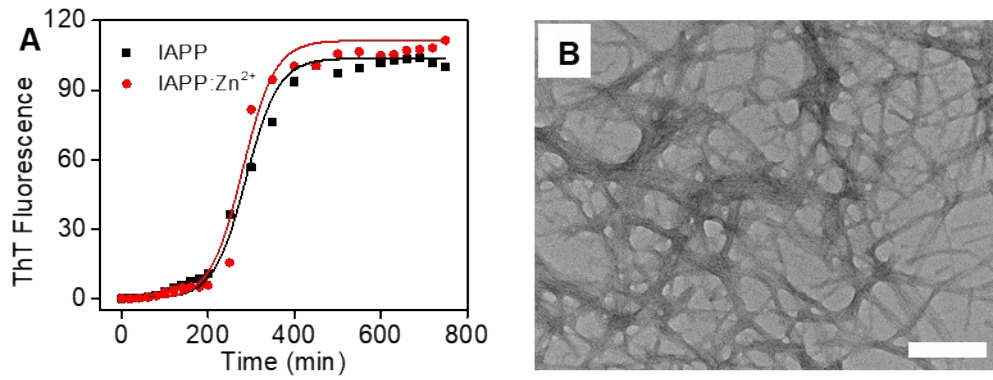

**Figure S3.** The effect of Zn<sup>2+</sup> on IAPP aggregation at the equivalent Zn<sup>2+</sup> concentration as that of M1@Zn<sup>2+</sup>. (A) IAPP aggregation kinetics monitored by ThT fluorescence assays upon addition of Zn<sup>2+</sup>. The final concentration of IAPP was 16 μM. (B) TEM image of end-point products of IAPP aggregation upon addition of Zn<sup>2+</sup>. Scale bar: 200 nm

**Table S1.** Quantification of IAPP secondary structure by analyzing CD data.

| Samples                  | $\alpha$ -Helix (%) | $\beta$ -Sheet (%) | Turns (%) | Random coils (%) |
|--------------------------|---------------------|--------------------|-----------|------------------|
| IAPP                     | 3.2                 | 39.4               | 20.3      | 37.1             |
| IAPP:M1                  | 3.2                 | 38.7               | 19.9      | 38.1             |
| IAPP:M1@Zn <sup>2+</sup> | 5.8                 | 18.5               | 19.7      | 55.9             |
